# Supplementary material for: Water-based eco-friendly fabrication of physicochemically crosslinked and highly wettable PU-rich electrospun PU/PEO nanofiber composites with exceptional chemical and thermal stability
Source: Royal Society of Chemistry journal article supplement (doi:10.1039/d3gc01738a), 2023-01-01
Supplement: d3gc01738a1.pdf [file d3gc01738a1.pdf]

## Supporting Information

Water-based eco-friendly fabrication of physicochemically crosslinked and highly wettable PU-rich electrospun PU/PEO nanofiber composites with exceptional chemical and thermal stability

Osamu Ohsawa,<sup>a,b,c,d</sup> Mayakrishnan Gopiraman,<sup>a,b</sup> Yan Ge,<sup>e</sup> Chunhong Zhu,<sup>a</sup> Kei Watanabe,<sup>a,c,\*</sup> and Ick Soo Kim<sup>a,\*</sup>

<sup>a</sup>*Nano Fusion Technology Research Group, <sup>b</sup>Division of Molecules and Polymers, Institute for Fiber Engineering (IFES), Interdisciplinary Cluster for Cutting Edge Research (ICCER), Shinshu University, Tokida 3-15-1, Ueda, Nagano 386-8567, Japan.*

<sup>c</sup>*NafiaS Inc., Fii building, Shinshu University (Ueda Campus), Tokida 3-15-1, Ueda, Nagano 386-8567, Japan.*

<sup>d</sup>*Smart Materials Science and Technology Unit, Textile Technology Division, Department of Science and Technology, Graduate School of Medicine, Science and Technology, Shinshu University, Tokida 3-15-1, Ueda, Nagano 386-8567, Japan.*

<sup>e</sup>*School of Textile and Clothing, Nantong University, Nantong 226019, PR China.*

*Email addresses of corresponding authors\**

*[kim@shinshu-u.ac.jp](mailto:kim@shinshu-u.ac.jp) (I.S. Kim); [k.watanabe@nafias-jp.com](mailto:k.watanabe@nafias-jp.com) (K. Watanabe)*

**Table S1.** Parameters applied for optimizing PU<sub>x</sub>/s-PEO<sub>y</sub>/CL<sub>z</sub>/bc-NFs blend nanofibers.

| Sample code                                                       | Polymer solution conditions |          |            | Electrospinning conditions |           |                           |
|-------------------------------------------------------------------|-----------------------------|----------|------------|----------------------------|-----------|---------------------------|
|                                                                   | PU                          | PEO      | CL         | Applied voltage (kV)       | TCD (cm)  | Solution feeding (mm/sec) |
| PU <sub>10</sub> /s-PEO <sub>0</sub> /CL <sub>1</sub> /bc-NFs     | 10                          | 0        | 1          | -                          | -         | -                         |
| PU <sub>9</sub> /s-PEO <sub>1</sub> /CL <sub>0.9</sub> /bc-NFs    | 9                           | 1        | 0.9        | 8                          | 8         | 0.0022                    |
| PU <sub>8</sub> /s-PEO <sub>2</sub> /CL <sub>0.8</sub> /bc-NFs    | 8                           | 2        | 0.8        | 8                          | 10        | 0.0018                    |
| PU <sub>7</sub> /s-PEO <sub>3</sub> /CL <sub>0.7</sub> /bc-NFs    | 7                           | 3        | 0.7        | 8                          | 10        | 0.0016                    |
| PU <sub>6</sub> /s-PEO <sub>4</sub> /CL <sub>0.6</sub> /bc-NFs    | 6                           | 4        | 0.6        | 8.5                        | 12        | 0.0015                    |
| PU <sub>5</sub> /s-PEO <sub>5</sub> /CL <sub>0.5</sub> /bc-NFs    | 5                           | 5        | 0.5        | 8.5                        | 12        | 0.0014                    |
| PU <sub>4</sub> /s-PEO <sub>6</sub> /CL <sub>0.4</sub> /bc-NFs    | 4                           | 6        | 0.4        | 8.5                        | 12        | 0.0013                    |
| <b>PU<sub>3</sub>/s-PEO<sub>7</sub>/CL<sub>0.3</sub>/bc-NFs 3</b> | <b>7</b>                    | <b>7</b> | <b>0.3</b> | <b>8.5</b>                 | <b>13</b> | <b>0.0010</b>             |
| <b>PU<sub>2</sub>/s-PEO<sub>8</sub>/CL<sub>0.2</sub>/bc-NFs 2</b> | <b>8</b>                    | <b>8</b> | <b>0.2</b> | <b>8.5</b>                 | <b>13</b> | <b>0.0006</b>             |
| PU <sub>1</sub> /s-PEO <sub>9</sub> /CL <sub>0.1</sub> /bc-NFs    | 1                           | 9        | 0.1        | 8.5                        | 12        | 0.0004                    |
| PU <sub>0</sub> /s-PEO <sub>10</sub> /CL <sub>0</sub> /bc-NFs     | 0                           | 10       | 0          | 9                          | 12        | 0.0002                    |

PU aqueous dispersion 30 wt%; PEO aqueous solution 6 wt%, CL- crosslinker 41.3 wt% aqueous solution

**Table S2.** Parameters applied for optimizing PU<sub>x</sub>/8-PEO<sub>y</sub>/CL<sub>z</sub>/bc-NFs blend nanofibers.

| Sample code                                                       | Polymer solution conditions |          |            | Electrospinning conditions |           |                           |
|-------------------------------------------------------------------|-----------------------------|----------|------------|----------------------------|-----------|---------------------------|
|                                                                   | PU                          | PEO      | CL         | Applied voltage (kV)       | TCD (cm)  | Solution feeding (mm/sec) |
| PU <sub>10</sub> /8-PEO <sub>0</sub> /CL <sub>1</sub> /bc-NFs     | 10                          | 0        | 1          | -                          | -         | -                         |
| PU <sub>9</sub> /8-PEO <sub>1</sub> /CL <sub>0.9</sub> /bc-NFs    | 9                           | 1        | 0.9        | 8                          | 8         | 0.0022                    |
| PU <sub>8</sub> /8-PEO <sub>2</sub> /CL <sub>0.8</sub> /bc-NFs    | 8                           | 2        | 0.8        | 8                          | 10        | 0.0018                    |
| PU <sub>7</sub> /8-PEO <sub>3</sub> /CL <sub>0.7</sub> /bc-NFs    | 7                           | 3        | 0.7        | 8                          | 10        | 0.0016                    |
| <b>PU<sub>6</sub>/8-PEO<sub>4</sub>/CL<sub>0.6</sub>/bc-NFs 6</b> | <b>6</b>                    | <b>4</b> | <b>0.6</b> | <b>8.5</b>                 | <b>12</b> | <b>0.0015</b>             |
| <b>PU<sub>5</sub>/8-PEO<sub>5</sub>/CL<sub>0.5</sub>/bc-NFs 5</b> | <b>5</b>                    | <b>5</b> | <b>0.5</b> | <b>8.5</b>                 | <b>12</b> | <b>0.0014</b>             |
| PU <sub>4</sub> /8-PEO <sub>6</sub> /CL <sub>0.4</sub> /bc-NFs    | 4                           | 6        | 0.4        | 8.5                        | 12        | 0.0013                    |
| PU <sub>3</sub> /8-PEO <sub>7</sub> /CL <sub>0.3</sub> /bc-NFs    | 3                           | 7        | 0.3        | 8.5                        | 13        | 0.0010                    |
| PU <sub>2</sub> /8-PEO <sub>8</sub> /CL <sub>0.2</sub> /bc-NFs    | 2                           | 8        | 0.2        | 8.5                        | 13        | 0.0006                    |
| PU <sub>1</sub> /8-PEO <sub>9</sub> /CL <sub>0.1</sub> /bc-NFs    | 1                           | 9        | 0.1        | 8.5                        | 12        | 0.0004                    |
| PU <sub>0</sub> /8-PEO <sub>10</sub> /CL <sub>0</sub> /bc-NFs     | 0                           | 10       | 0          | 9                          | 12        | 0.0002                    |

PU aqueous dispersion 30 wt%; PEO aqueous solution 6 wt%, CL- crosslinker 41.3 wt% aqueous solution

**Table S3.** Parameters applied for optimizing PU<sub>x</sub>/3-PEO<sub>y</sub>/CL<sub>z</sub>/bc-NFs blend nanofibers.

| Sample code                                                      | Polymer solution conditions |          |            | Electrospinning conditions |           |                           |
|------------------------------------------------------------------|-----------------------------|----------|------------|----------------------------|-----------|---------------------------|
|                                                                  | PU                          | PEO      | CL         | Applied voltage (kV)       | TCD (cm)  | Solution feeding (mm/sec) |
| PU <sub>10</sub> /3-PEO <sub>0</sub> /CL <sub>1</sub> /bc-NFs    | 10                          | 0        | 1          | -                          | -         | -                         |
| PU <sub>9</sub> /3-PEO <sub>1</sub> /CL <sub>0.9</sub> /bc-NFs   | 9                           | 1        | 0.9        | 8                          | 8         | 0.0022                    |
| PU <sub>8</sub> /3-PEO <sub>2</sub> /CL <sub>0.8</sub> /bc-NFs   | 8                           | 2        | 0.8        | 8                          | 10        | 0.0018                    |
| PU <sub>7</sub> /3-PEO <sub>3</sub> /CL <sub>0.7</sub> /bc-NFs   | 7                           | 3        | 0.7        | 8                          | 10        | 0.0016                    |
| PU <sub>6</sub> /3-PEO <sub>4</sub> /CL <sub>0.6</sub> /bc-NFs   | 6                           | 4        | 0.6        | 8.5                        | 12        | 0.0015                    |
| PU <sub>5</sub> /3-PEO <sub>5</sub> /CL <sub>0.5</sub> /bc-NFs   | 5                           | 5        | 0.5        | 8.5                        | 12        | 0.0014                    |
| PU <sub>4</sub> /3-PEO <sub>6</sub> /CL <sub>0.4</sub> /bc-NFs   | 4                           | 6        | 0.4        | 8.5                        | 12        | 0.0013                    |
| <b>PU<sub>3</sub>/3-PEO<sub>7</sub>/CL<sub>0.3</sub>/bc-NFs3</b> |                             | <b>7</b> | <b>0.3</b> | <b>8.5</b>                 | <b>13</b> | <b>0.0010</b>             |
| <b>PU<sub>2</sub>/3-PEO<sub>8</sub>/CL<sub>0.2</sub>/bc-NFs2</b> |                             | <b>8</b> | <b>0.2</b> | <b>8.5</b>                 | <b>13</b> | <b>0.0006</b>             |
| PU <sub>1</sub> /3-PEO <sub>9</sub> /CL <sub>0.1</sub> /bc-NFs   | 1                           | 9        | 0.1        | 8.5                        | 12        | 0.0004                    |
| PU <sub>0</sub> /3-PEO <sub>10</sub> /CL <sub>0</sub> /bc-NFs    | 0                           | 10       | 0          | 9                          | 12        | 0.0002                    |

PU aqueous dispersion 30 wt%; PEO aqueous solution 6 wt%, CL- crosslinker 41.3 wt% aqueous solution

**Table S4.** Parameters applied for optimizing PU<sub>x</sub>/4-PEO<sub>y</sub>/CL<sub>z</sub>/bc-NFs blend nanofibers.

| Sample code                                                      | Polymer solution conditions |          |            | Electrospinning conditions |           |                           |
|------------------------------------------------------------------|-----------------------------|----------|------------|----------------------------|-----------|---------------------------|
|                                                                  | PU                          | PEO      | CL         | Applied voltage (kV)       | TCD (cm)  | Solution feeding (mm/sec) |
| PU <sub>10</sub> /4-PEO <sub>0</sub> /CL <sub>1</sub> /bc-NFs    | 10                          | 0        | 1          | -                          | -         | -                         |
| PU <sub>9</sub> /4-PEO <sub>1</sub> /CL <sub>0.9</sub> /bc-NFs   | 9                           | 1        | 0.9        | 8                          | 8         | 0.0022                    |
| PU <sub>8</sub> /4-PEO <sub>2</sub> /CL <sub>0.8</sub> /bc-NFs   | 8                           | 2        | 0.8        | 8                          | 10        | 0.0018                    |
| PU <sub>7</sub> /4-PEO <sub>3</sub> /CL <sub>0.7</sub> /bc-NFs   | 7                           | 3        | 0.7        | 8                          | 10        | 0.0016                    |
| PU <sub>6</sub> /4-PEO <sub>4</sub> /CL <sub>0.6</sub> /bc-NFs   | 6                           | 4        | 0.6        | 8.5                        | 12        | 0.0015                    |
| <b>PU<sub>5</sub>/4-PEO<sub>5</sub>/CL<sub>0.5</sub>/bc-NFs5</b> |                             | <b>5</b> | <b>0.5</b> | <b>8.5</b>                 | <b>12</b> | <b>0.0014</b>             |
| <b>PU<sub>4</sub>/4-PEO<sub>6</sub>/CL<sub>0.4</sub>/bc-NFs4</b> |                             | <b>6</b> | <b>0.4</b> | <b>8.5</b>                 | <b>12</b> | <b>0.0013</b>             |
| PU <sub>3</sub> /4-PEO <sub>7</sub> /CL <sub>0.3</sub> /bc-NFs   | 3                           | 7        | 0.3        | 8.5                        | 13        | 0.0010                    |
| PU <sub>2</sub> /4-PEO <sub>8</sub> /CL <sub>0.2</sub> /bc-NFs   | 2                           | 8        | 0.2        | 8.5                        | 13        | 0.0006                    |
| PU <sub>1</sub> /4-PEO <sub>9</sub> /CL <sub>0.1</sub> /bc-NFs   | 1                           | 9        | 0.1        | 8.5                        | 12        | 0.0004                    |
| PU <sub>0</sub> /4-PEO <sub>10</sub> /CL <sub>0</sub> /bc-NFs    | 0                           | 10       | 0          | 9                          | 12        | 0.0002                    |

PU aqueous dispersion 30 wt%; PEO aqueous solution 6 wt%, CL- crosslinker 41.3 wt% aqueous solution

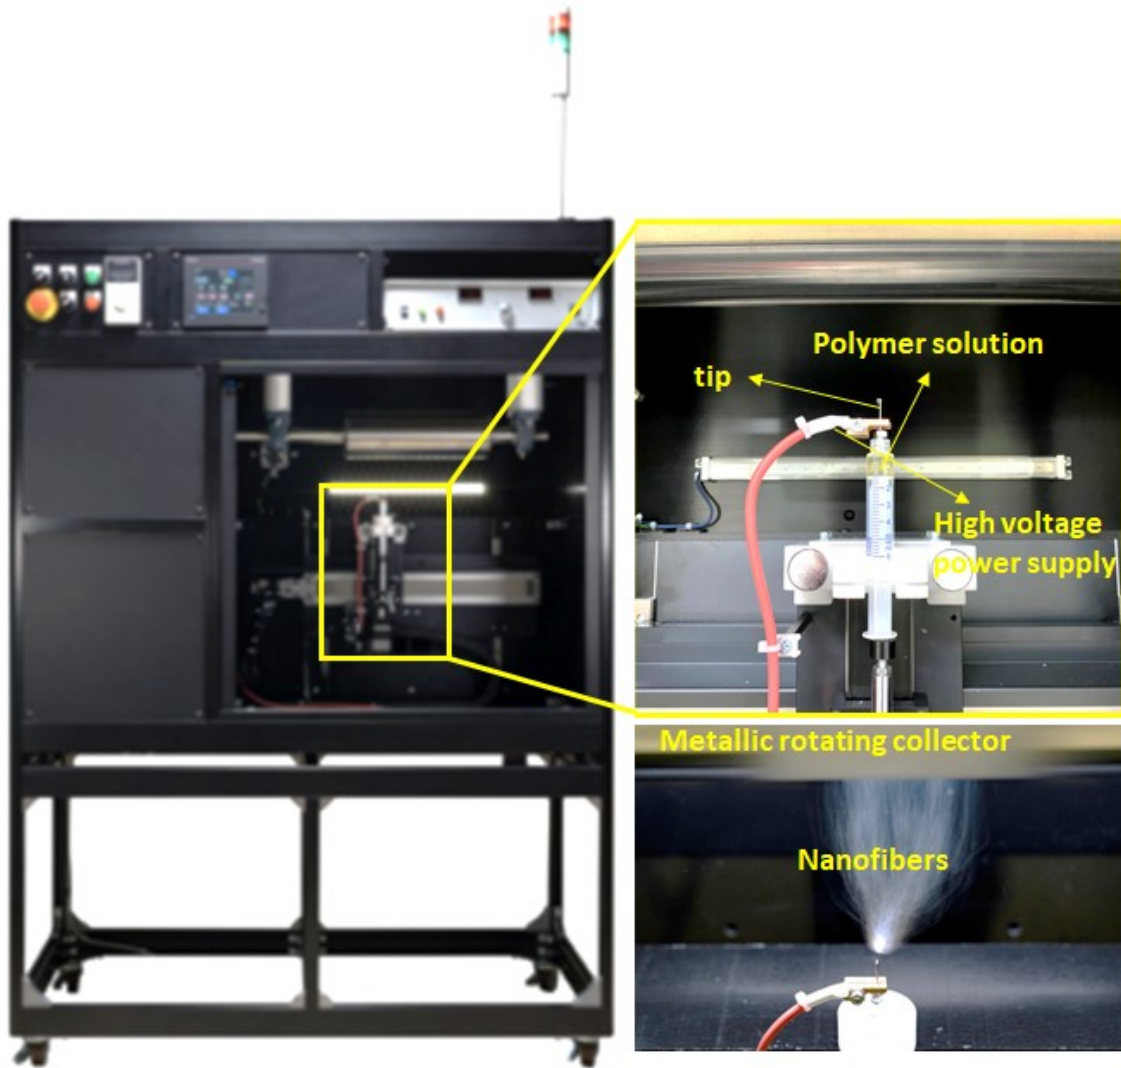

**Fig. S1.** Electrospinning Setup

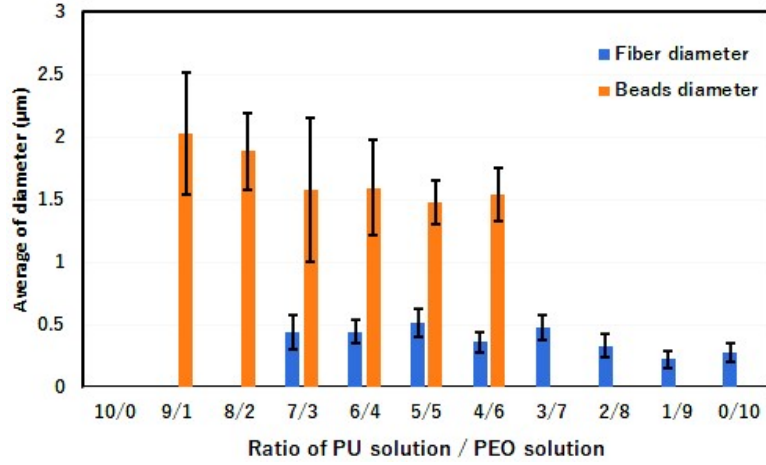

**Fig. S2.** Average fiber diameter of PU/PEO nanofibers at different PU:PEO mass ratios.

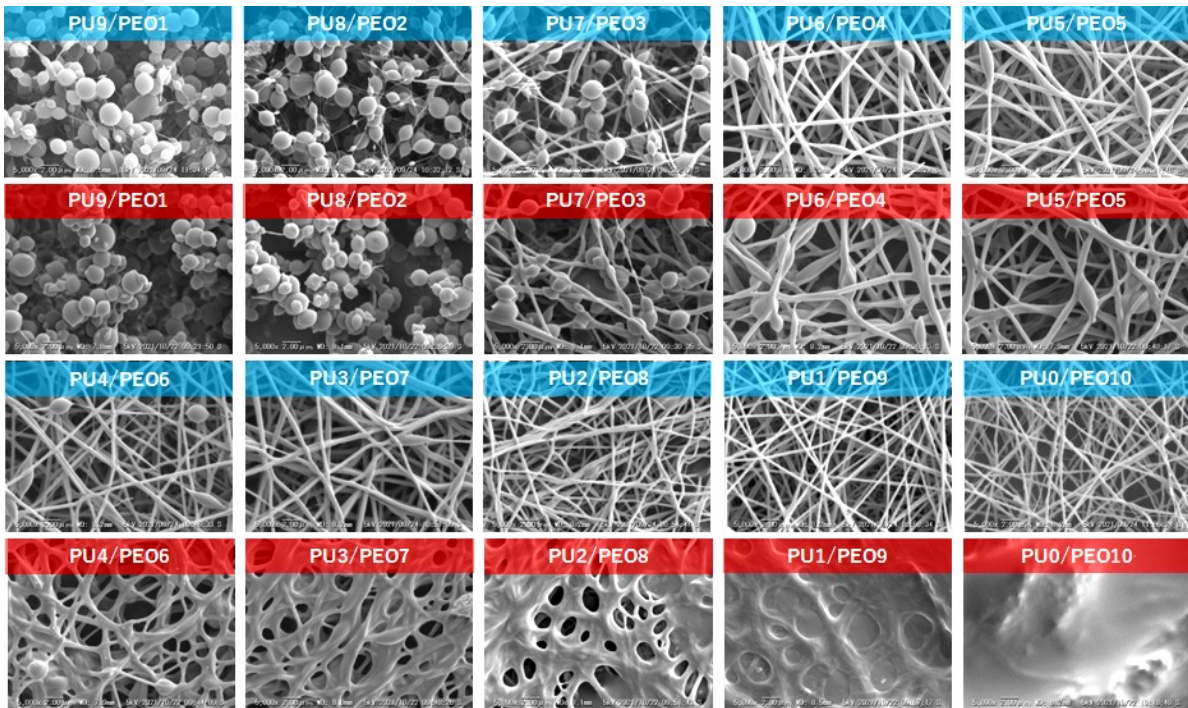

**Fig. S3.** SEM images of PU<sub>x</sub>/s-PEO<sub>y</sub>/CL<sub>z</sub> nanofibers before and after crosslinking.



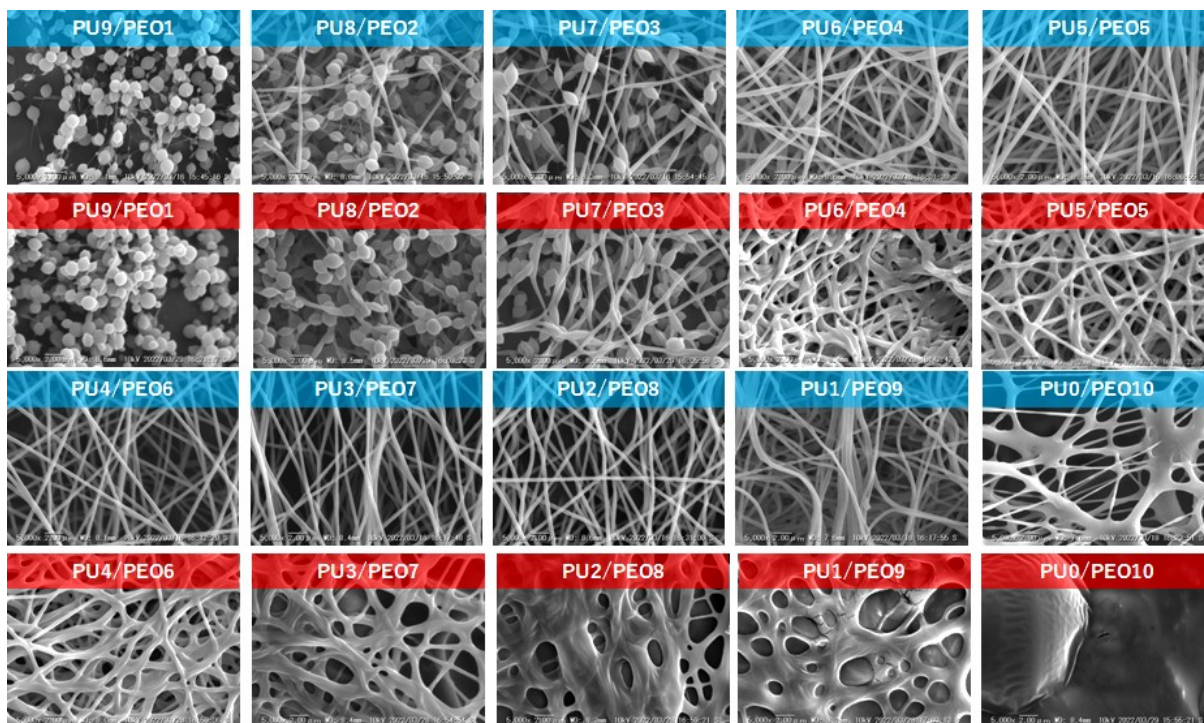

**Fig. S4.** SEM images of PU<sub>x</sub>/4-PEO<sub>y</sub>/CL<sub>z</sub> nanofibers before and after crosslinking.

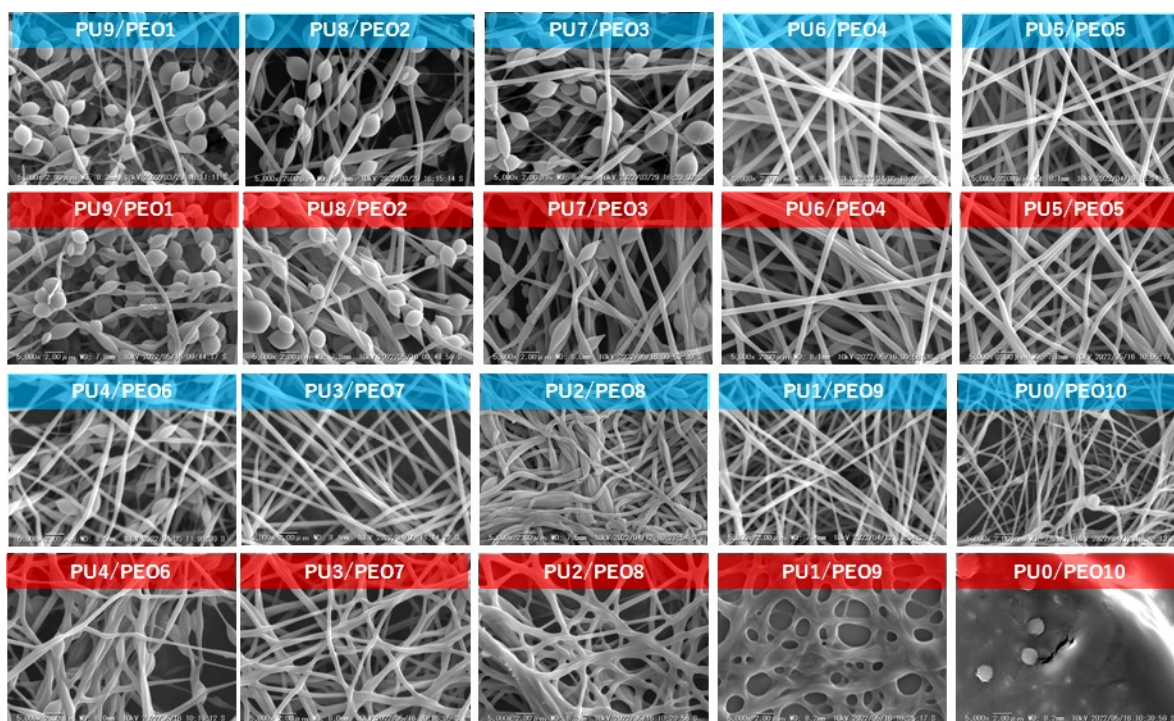

**Fig. S5.** SEM images of PU<sub>x</sub>/8-PEO<sub>y</sub>/CL<sub>z</sub> nanofibers before and after crosslinking.

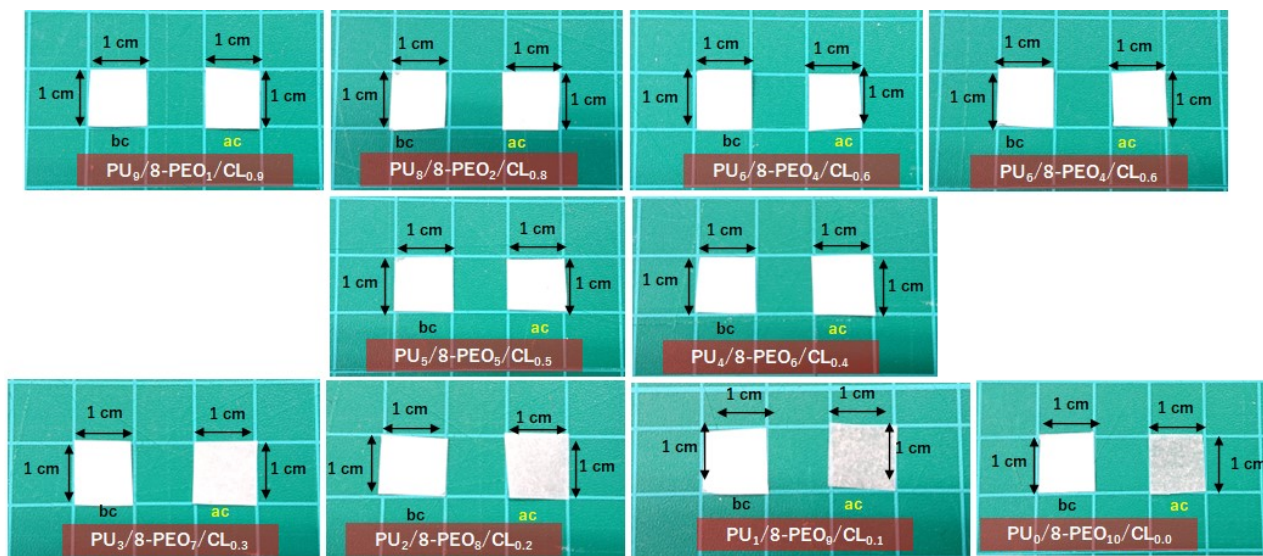

**Fig. S6.** Physical stability of  $PU_x/8-PEO_y/CL_z$  nanofibers before and after crosslinking.

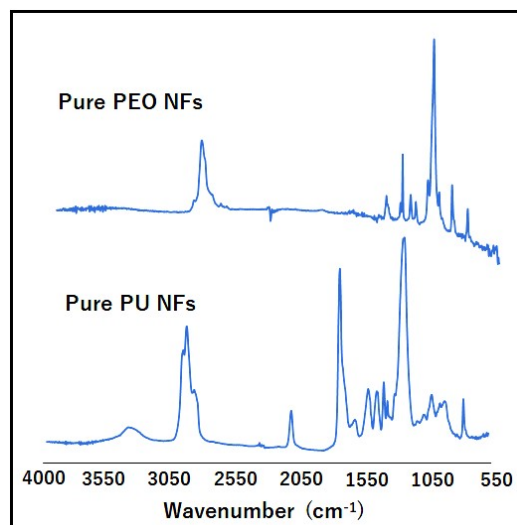

**Fig. S7.** FT-IR spectra of PEO nanofibers and PU nanofiber composite.



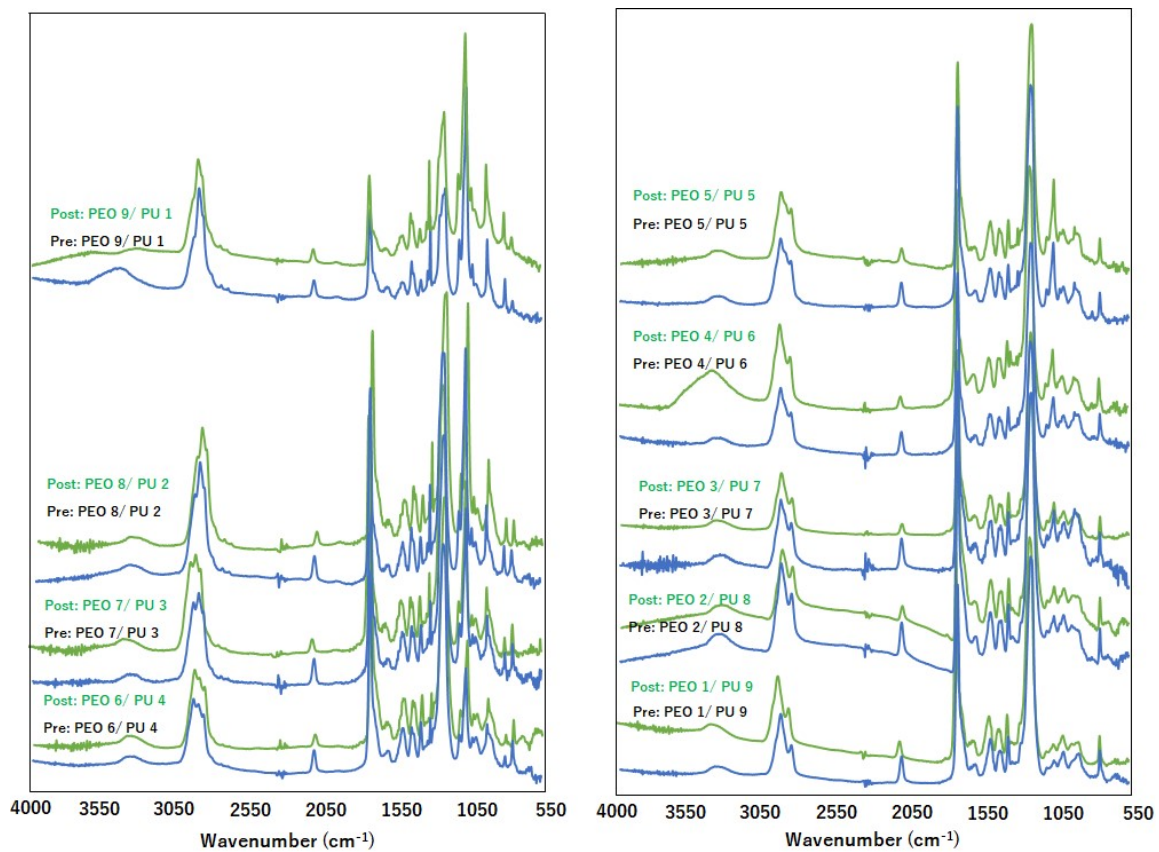

**Fig. S8.** FT-IR spectra of PU<sub>x</sub>/s-PEO<sub>y</sub>/CL<sub>z</sub> nanofiber composites before and after crosslinking.



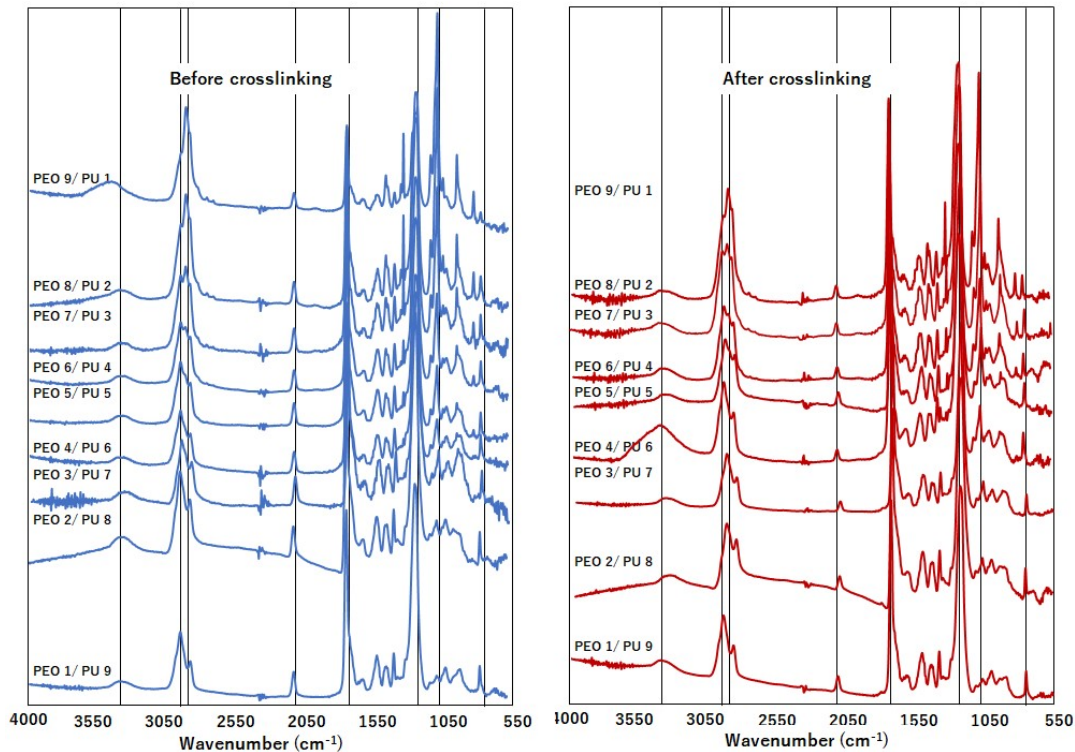

**Fig. S9.** FT-IR spectra of  $PU_x/4-PEO_y/CL_z$  nanofiber composites before and after crosslinking.

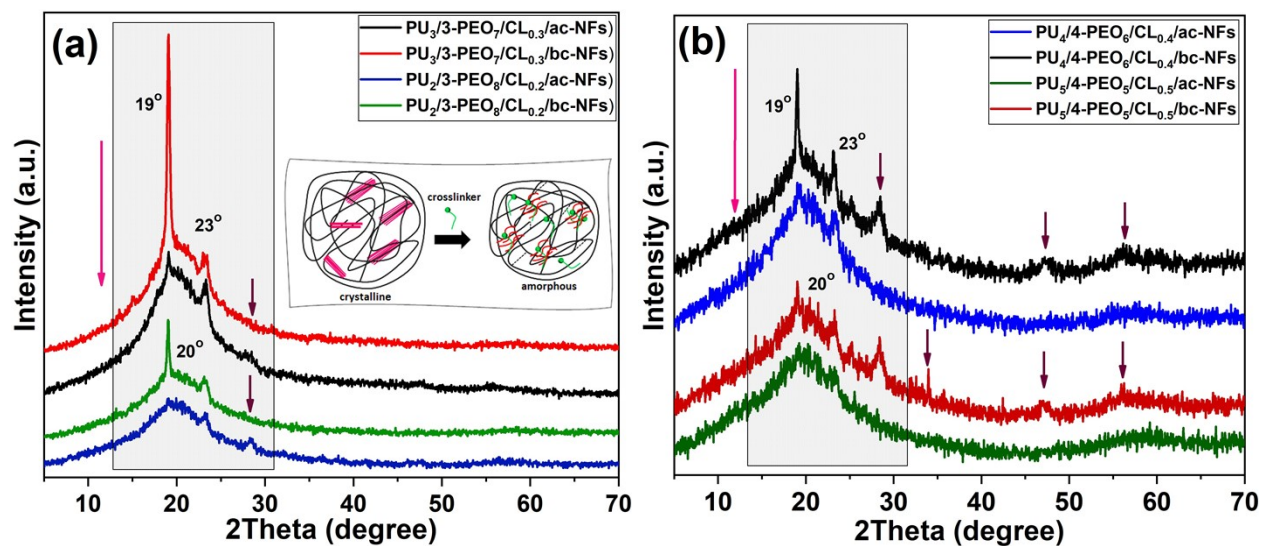

**Fig. S10.** XRD patterns of (a)  $PU_x/3-PEO_y/CL_z$ -bc-NFs and (b)  $PU_x/4-PEO_y/CL_z$ -bc-NFs nanofiber composites and before and after thermal crosslinking ( $PU_x/g-PEO_y/CL_z$ -ac-NFs).

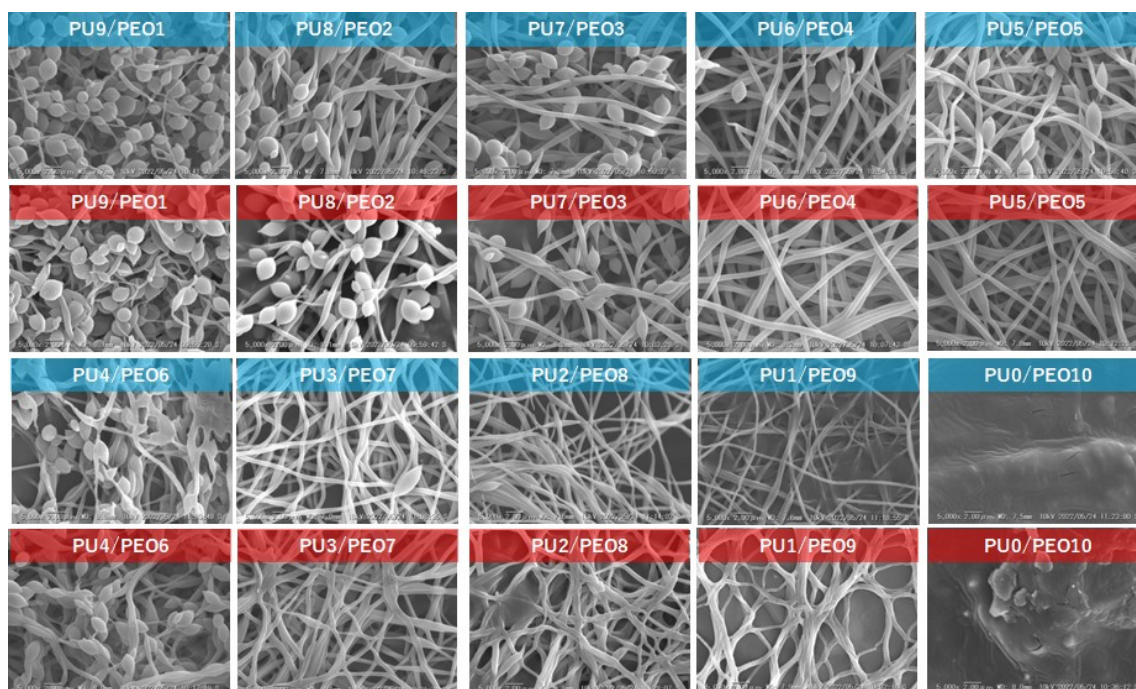

**Fig. S11.** SEM images of  $PU_x/8-PEO_y/CL_z$  nanofiber composites before and after dipped in hot water at  $90^\circ\text{C}$  for 3h (red – crosslinked and blue – non-crosslinked).

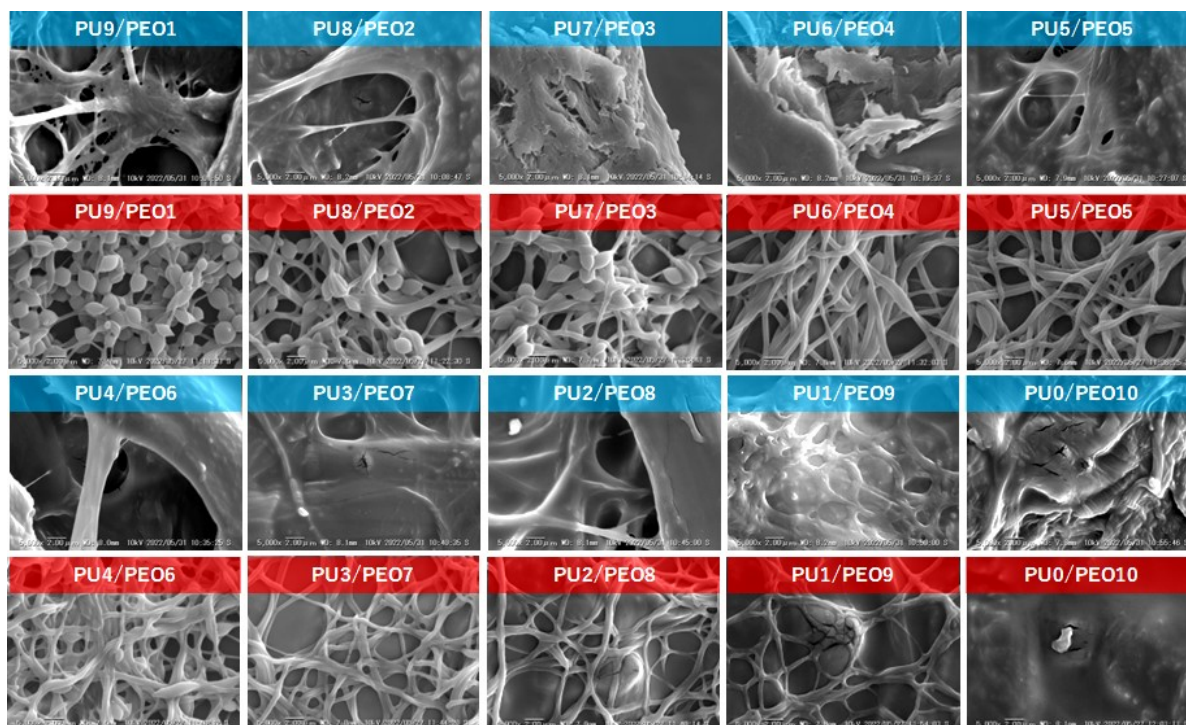

**Fig. S12.** SEM images of  $PU_x/8-PEO_y/CL_z$  NFs composites before and after dipped in DMF at  $60^\circ\text{C}$  for 3h (red – crosslinked and blue – non-crosslinked).



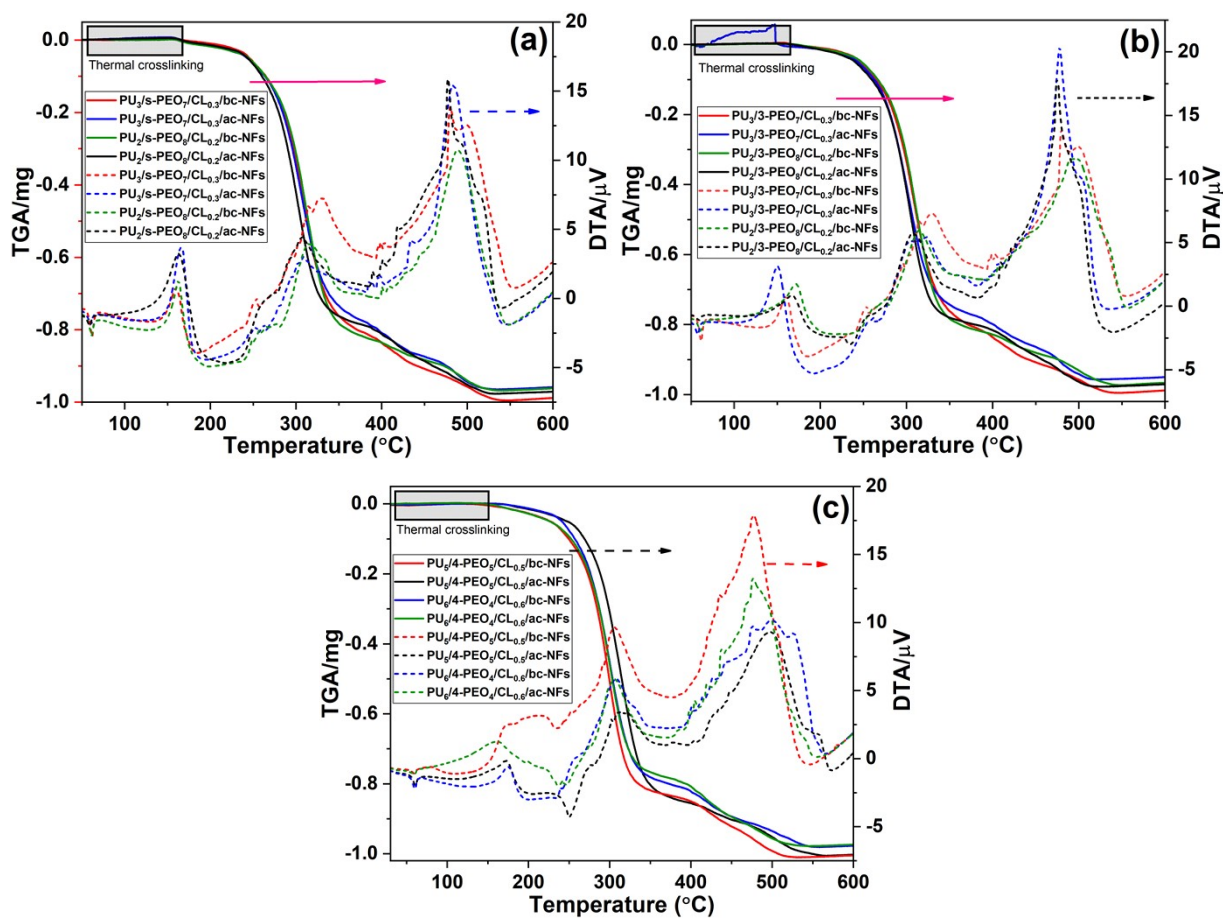

**Fig. S13.** TG-DTA curves of (a) PU<sub>x</sub>/s-PEO<sub>y</sub>/CL<sub>z</sub>-bc-NFs, (b) PU<sub>x</sub>/3-PEO<sub>y</sub>/CL<sub>z</sub>-bc-NFs and (c) PU<sub>x</sub>/4-PEO<sub>y</sub>/CL<sub>z</sub>-bc-NFs nanofibers composites and the nanofiber composites after crosslinking (PU<sub>x</sub>/g-PEO<sub>y</sub>/CL<sub>z</sub>-ac-NFs).
